# Supplementary material for: Differential Effects of 2-Hydroxypropyl-Cyclodextrins on Lipid Accumulation in Npc1-Null Cells
Source: MDPI journal article supplement (doi:10.3390/ijms21030898), 2020-01-30
Supplement: s1 [file s1]

**Table S1.** List of sphingolipids detected and quantified in this study.

|                |               |               |                   |
|----------------|---------------|---------------|-------------------|
| Cer(18:1/16:0) | SM(18:1/16:0) | SM(18:1/23:0) | HexCer(18:1/16:0) |
| Cer(18:1/18:0) | SM(18:1/18:0) | SM(18:1/23:1) | HexCer(18:1/18:0) |
| Cer(18:1/20:0) | SM(18:1/18:1) | SM(18:1/24:0) | HexCer(18:1/20:0) |
| Cer(18:1/22:0) | SM(18:1/19:0) | SM(18:1/24:1) | HexCer(18:1/22:0) |
| Cer(18:1/22:1) | SM(18:1/20:0) | SM(18:1/24:2) | HexCer(18:1/22:1) |
| Cer(18:1/23:0) | SM(18:1/20:1) | SM(18:1/26:1) | HexCer(18:1/24:0) |
| Cer(18:1/24:0) | SM(18:1/21:0) | SM(18:1/26:2) | HexCer(18:1/24:1) |
| Cer(18:1/24:1) | SM(18:1/21:1) | SM(18:0/22:0) | HexCer(18:1/24:2) |
| Cer(18:1/24:2) | SM(18:1/22:0) | SM(18:0/22:1) | HexCer(18:1/26:0) |
| Cer(18:1/25:0) | SM(18:1/22:1) | SM(18:0/24:1) | HexCer(18:1/26:1) |
| Cer(18:0/16:0) | SM(18:1/22:2) |               | HexCer(18:0/24:0) |

# Untreated *Npc1* null vs. Untreated WT cells

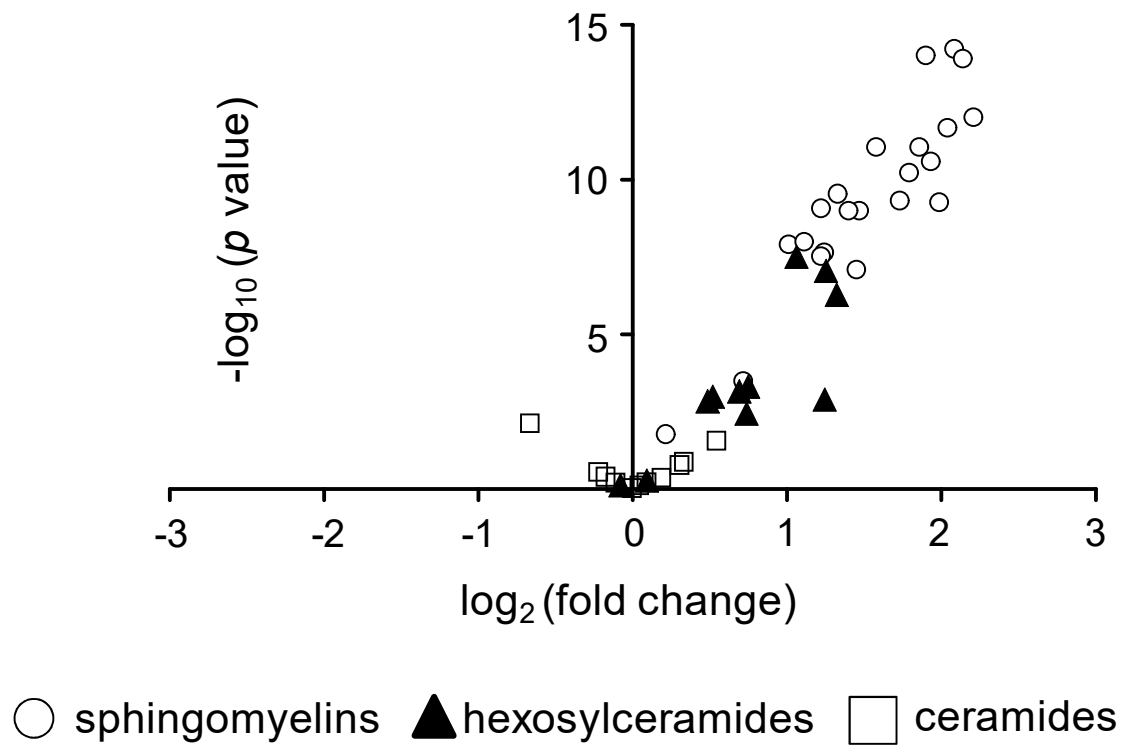

**Figure S1.** Comparison of cellular sphingolipid content between *Npc1*-null and WT CHO cells. The x-axis shows the logarithm to base 2 of fold changes in each sphingolipid level of *Npc1*-null CHO cells compared with WT CHO cells. The y-axis shows the negative logarithm to base 10 of t-test *p*-values. Open circle: sphingomyelins, closed triangle: hexosylceramides, open square: ceramides.

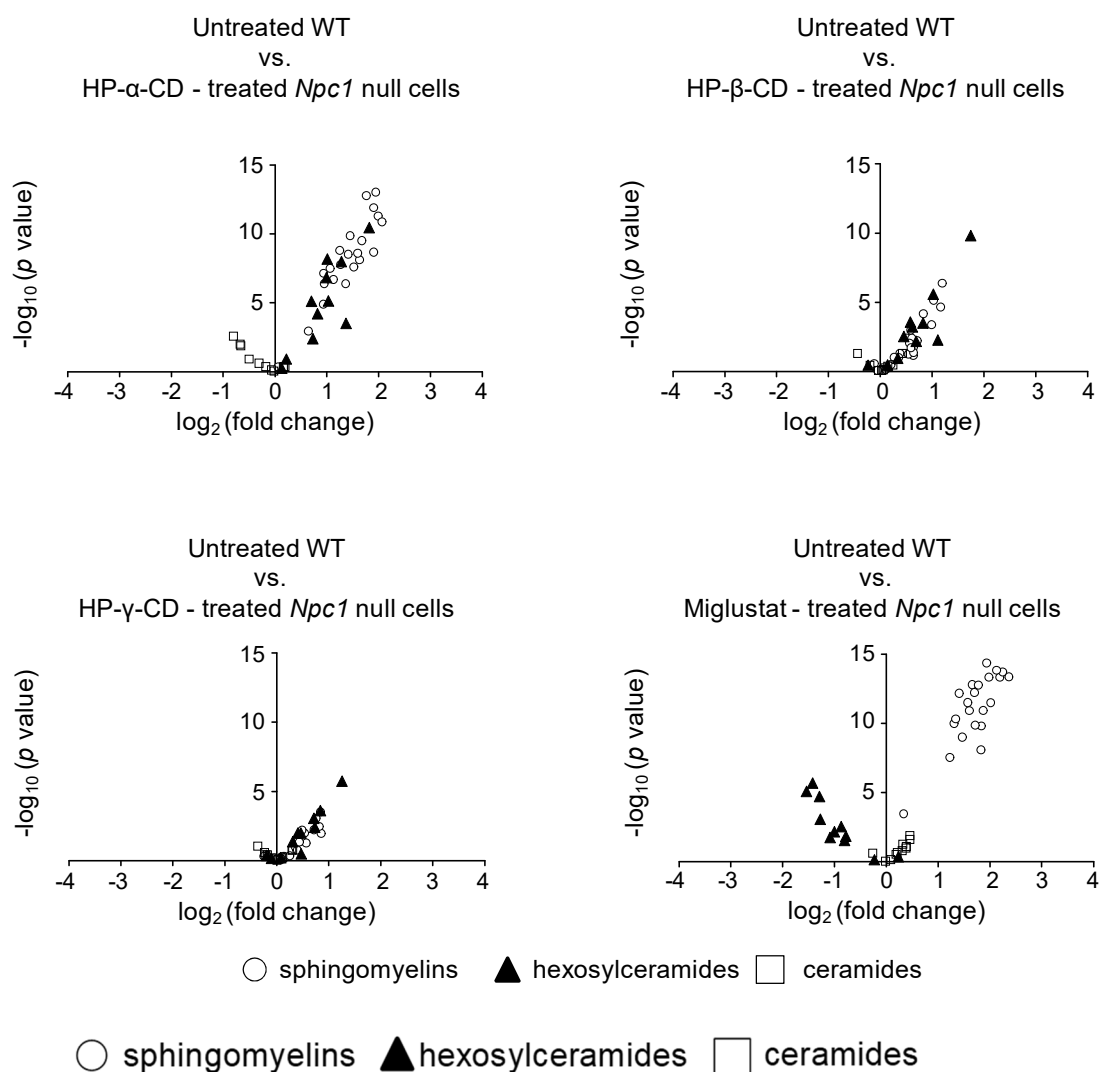

**Figure S2.** Comparison of cellular sphingolipid contents between WT CHO cells and treated *Npc1*-null cells. The x-axis shows the logarithm to base 2 of fold changes in each sphingolipid level of treated *Npc1*-null CHO cells compared with WT CHO cells. The y-axis shows the negative logarithm to base 10 of t-test  $p$ -values. Open circle: sphingomyelins, closed triangle: hexosylceramides, open square: ceramides.
